# Supplementary material for: Nomogram model based on dual-energy CT quantitative parameters and radiomics for preoperative prediction of microvascular invasion in hepatocellular carcinoma
Source: Research Square preprint supplement (doi:10.21203/rs.3.rs-6962833/v1), 2025-07-22
Supplement: Supplementary file 1 [file efe4eb38ed1f4efac511a824.docx]

**Supplementary Material**

S1. Methods: CT imaging protocol

Abdominal multi-phase enhanced scanning was performed using a SOMATOM FORCE scanner (Siemens Healthineers) with the following parameters: tube voltage of 90/150 kVp, tube current regulated by automatic mA modulation technology, pitch of 0.6, rotation time of 0.5 s/r, and both slice thickness and interval set at 5 mm. The scanning range extended from the upper margin of the xiphoid process to the lower pole of the kidneys. For contrast-enhanced imaging, a high-pressure injector was used to administer ioversol (Bayer, 350 mgI/ml) into the antecubital vein at a flow rate of 3-4 ml/s, with a dose of 1-1.2 ml/kg body weight. Arterial phase images were acquired 25-30 seconds post-injection, portal venous phase images at 60-75 seconds, and delayed phase images at 120-150 seconds.

S2. Methods: DECT quantitative parameters

The reconstructed thin-slice CT imaging data were transferred to software (syngo.via,version VB20; Siemens Healthineers) for postprocessing analysis. DECT images were analyzed using an iodinesubtraction algorithm (VNC; Siemens Healthineers) to calculate iodine concentration (IC), normalized iodine concentration (NIC), and fat fraction (FF). A radiologist with > 10 years of experience in abdominal radiology, who was blinded to postoperative outcomes and pathological information, identified the regions of interest (ROI). The area of ROI was placed within the HCC lesion that may contain the largest lesion area to avoid significant necrosis, cysts and vascular areas. Across the different phases, ROI size, shape, and position remained consistent via the copy-and-paste function. After selecting the largest slice of HCC lesions, the adjacent upper and lower slices were used to placethe ROIs. One ROI was placed on the abdominal aorta at the same level of the lesion to normalize the values, and another ROI was placed on the HCC lesion to calculate NIC. Next, we calculated effective atomic number (Zeff) and electron density (Rho) in the Rho/Z mode. All parameters were measured by radiologist, and 3-slice lesion averages were used for analysis.

S3. Results: formula of the Radiomics Score

PV Rad-score =

-0.285567044×gradient_glszm_LowGrayLevelZoneEmphasis

+0.351814872×log-sigma-3D_glszm_SizeZoneNonUniformityNormalized

+0.304896147×log-sigma-3D_glszm_GrayLevelNonUniformity

+0.304896147×logarithm_glcm_ClusterShade

-0.384888568×logarithm_glszm_HighGrayLevelZoneEmphasis

-0.298466368×wavelet-HLH_glszm_SmallAreaEmphasis

+0.320686487×wavelet-LHH_glszm_LargeAreaLowGrayLevelEmphasis

+0.332325994×wavelet-LLH_glszm_GrayLevelNonUniformit

VMI Rad-score =

0.685625653×log-sigma-3D_firstorder_Maximum

-0.908925358×log-sigma-3D_gldm_LargeDependenceHighGrayLevelEmphasis

+0.663961481×logarithm_glszm_GrayLevelNonUniformity

+0.712734384×logarithm_glszm_GrayLevelVariance

-0.691755862×wavelet-HHL_firstorder_Median

-0.807665972×wavelet-HLL_firstorder_Minimum

+0.657870360×wavelet-LHH_firstorder_Skewness

-1.142703691×wavelet-LLH_glszm_GrayLevelNonUniformityNormalized
